# Supplementary material
Source: PubMed Central journal article supplement (PMC2829750)
Supplement: NIHMS178774-supplement-1_si_001.pdf [file NIHMS178774-supplement-1_si_001.pdf]

## Supporting Information: Protein Binding has a Large Effect on Radical Mediated DNA Damage.

Xiaohua Peng<sup>1</sup>, Ying Z. Pigli<sup>2</sup>, Phoebe A. Rice<sup>2</sup>, and Marc M. Greenberg<sup>1\*</sup>

<sup>1</sup>Department of Chemistry, The Johns Hopkins University, 3400 N. Charles St., Baltimore MD 21218;

<sup>2</sup>Department of Biochemistry and Molecular Biology, The University of Chicago, 929 E. 57th. St., Chicago IL 60637

### Contents:

1. Experimental procedures. (S1 – S3)
2. **Supporting Information Figure 1.** Phosphorimage autoradiogram of 12% non-denaturing PAGE analysis of Hbb-DNA binding (5'-<sup>32</sup>P-**5**) with 20 nM DNA and different concentrations of Hbb. (S4)
3. **Supporting Information Figure 2.** Phosphorimage autoradiogram of 12% denaturing PAGE analysis of ICL formation from **3** in 5'-<sup>32</sup>P-**5** (strand containing **3** labeled) in the presence or absence of Hbb. (S4)
4. **Supporting Information Figure 3.** Phosphorimage autoradiogram of 12% denaturing PAGE analysis of ICL formation from **3** in 5'-<sup>32</sup>P-**6** (strand containing **3** labeled) in the presence or absence of Hbb. (S4)
5. **Supporting Information Figure 4.** Phosphorimage autoradiogram of 12% denaturing PAGE analysis of ISC formation from **4** (strand containing **4** labeled) in 5'-<sup>32</sup>P-**7** in the presence or absence of Hbb. (S5)
6. **Supporting Information Figure 5.** Ratio of [ssDNA]:[ICL] produced from photolysis of 5'-<sup>32</sup>P-**7** (strand containing **4** labeled) in the presence of Hbb as a function of BME concentration (0 - 4 mM). (S5)
7. **Supporting Information Figure 6.** Histogram showing Fe·EDTA cleavage of ICL formed from **3** in duplex **5** (**A**) and from **4** in **7** (**B**) generated by UV-irradiation (Complementary strand was 5'-<sup>32</sup>P-labelled). (S6)
8. **Supporting Information Figure 7.** ESI-MS of the oligonucleotide containing **3** at Hbb bending site. (S7)
9. **Supporting Information Figure 8.** ESI-MS of the oligonucleotide containing **3** at non-bending site. (S8)
10. **Supporting Information Figure 9.** ESI-MS of the oligonucleotide containing **4** at Hbb bending site. (S9)
11. **Supporting Information Figure 10.** ESI-MS of the oligonucleotide containing **4** at non-bending site. (S10)

**General Methods.** Unless otherwise specified, chemicals were purchased from Aldrich or Fisher Scientific and enzymes were obtained from New England Biolabs. Hbb was isolated as previously described.<sup>1</sup> Oligonucleotides were synthesized via standard automated DNA synthesis techniques using an Applied Biosystems model 394 instrument. The Pac-dA and <sup>3</sup>Pr-Pac-dG phosphoramidites were employed for the synthesis of oligonucleotides containing **3** and **4**. Pivaloyl anhydride/2,6-lutidine/THF (1:1:8) was used as capping reagent and 1 M t-butyl-hydroperoxide in toluene was used as oxidizing

reagent.<sup>2</sup> The oxidation time is 40 s and the capping time is 25 s. Deprotection of the nucleobases and phosphate moieties as well as cleavage of the linker were carried out under mild deprotection conditions (28% aq. NH<sub>3</sub>, room temperature, 3 h). Oligonucleotides were purified by 20% denaturing polyacrylamide gel electrophoresis and characterized by ESI-MS. Oligonucleotides containing **3** or **4** were subjected to additional purification by reversed-phase HPLC on a RP-C18 column (VARIAN, Microsorb-MV 100-5 C18 250 × 4.6 mm). Monitoring was carried out at 260 nm. The peak of interest was collected using the following gradient conditions: 0-5 min 100% A, 5-20 min 0-15% B in A, 20-55 min 15-22% B in A, 55-60 min 22-80% B in A, 60-65 min 80-0% B in A, 65-75 min 100% A, at a flow rate 1.0 mL/min) [A: 0.05 M (Et<sub>3</sub>NH)OAc (pH 7.0)/MeCN 95:5; B: 0.05 M (Et<sub>3</sub>NH)OAc (pH 7.0)/MeCN 50:50]. Radiolabeling was carried out according to the standard protocols.<sup>3</sup> [ $\gamma$ -<sup>32</sup>P]ATP was purchased from Amersham Pharmacia Biotech. Quantification of radiolabeled oligonucleotides was carried out using a Molecular Dynamics Phosphorimager equipped with ImageQuant Version 5.1 software. ESI-MS spectra were collected using a Thermoquest LCQ-Deca Ion Trap instrument.

### **Protein binding and cross-linking reactions.**

All reactions involving Hbb were carried out in siliconized tubes. Hbb was isolated as previously described.<sup>1</sup> Protein dilutions were made in 25 mM HEPES/NaOH (pH 7.5), 50 mM NaCl, 10% glycerol and 50  $\mu$ g mL<sup>-1</sup> bovine serum albumin. The binding of DNA (20 nM, 5'-<sup>32</sup>P-**5-8**) with Hbb (600 nM) was performed in 10 mM HEPES/NaOH (pH 7.5), 25 mM NaCl, 5 mM MgCl<sub>2</sub>, 5% glycerol and 0.5  $\mu$ g mL<sup>-1</sup> non-specific duplex DNA (total volume 20  $\mu$ L). The non-specific duplex DNA was the same as that used previously.<sup>1</sup> The binding is complete by incubation at r.t. for 15 min and 4 °C for 15 min. The cross-link reaction was carried out immediately after the binding reaction by UV-irradiation (350 nm) at r.t. for 2 h. Photolyses were carried out under aerobic conditions in a Rayonet photoreactor equipped with 16 lamps that emit at a maximum wavelength = 350 nm. The cross-linking reaction in the absence of Hbb was performed in the same conditions, including buffer, incubation, and UV-irradiation.

### **Competitive kinetics for ICL formation in the presence or absence of Hbb.**

DNA samples (34  $\mu\text{L}$ , 23.5 nM) were prepared in 10 mM HEPES/NaOH (pH 7.5), 25 mM NaCl, 5 mM  $\text{MgCl}_2$ , 5% glycerol, 0.5  $\mu\text{g mL}^{-1}$  non-specific duplex DNA and different concentrations of 2-mercaptoethanol (BME) (0-4 mM). Each sample was divided into two portions. One portion was added 4  $\mu\text{M}$  Hbb (3  $\mu\text{L}$ ) and another was added the same amount of protein dilution buffer (25 mM HEPES/NaOH (pH 7.5), 50 mM NaCl, 10% glycerol and 50  $\mu\text{g mL}^{-1}$  bovine serum albumin). All samples (total volume 20  $\mu\text{L}$ , 20 nM) were incubated at r.t. for 15 min and 4  $^\circ\text{C}$  for 15 min, irradiated with 350 nm UV for 2 h, immediately quenched with 20  $\mu\text{L}$  loading buffer (95% formamide, 10 mM EDTA, and 20  $\mu\text{M}$  non-specific DNA), heated at 90  $^\circ\text{C}$  for 3 min, and stored at -80  $^\circ\text{C}$  until subjecting to PAGE analysis. The cross-linked reactions (6  $\mu\text{L}$ ) were loaded onto 12% polyacrylamide (19:1) in 0.5  $\times$  TBE buffer and electrophoresed at  $\sim 8 \text{ V cm}^{-1}$  for 4 h at r.t.

### **Fe $\cdot$ EDTA reaction.**

The cross-linked DNAs formed in duplexes **5** and **7** in the presence of Hbb were purified by 20% denaturing PAGE. The band containing cross-linked product was cut, crushed, and eluted with 200 mM NaCl, 20 mM EDTA (2.0 mL). The crude product was desalted using a  $\text{C}_{18}$ -SepPak column, eluting with  $\text{H}_2\text{O}$  (3  $\times$  10.0 mL) followed by 1.0 mL  $\text{MeOH:H}_2\text{O}$  (3:2, 1.0 mL). Fe (II)  $\cdot$  EDTA cleavage reactions were carried out in a buffer containing 10 mM sodium phosphate (pH 7.2), 10 mM NaCl, 100  $\mu\text{M}$  EDTA, 1.0 mM sodium ascorbate, 2.0 mM  $\text{H}_2\text{O}_2$ , and 50  $\mu\text{M}$   $(\text{NH}_4)_2\text{Fe}(\text{SO}_4)_2$  (total volume 20  $\mu\text{L}$ ) at 25  $^\circ\text{C}$  for 3 min, and quenched with 10  $\mu\text{L}$  thiourea (100 mM). Samples were lyophilized, treated with 1.0 M piperidine (20  $\mu\text{L}$ ) at 90  $^\circ\text{C}$  for 20 min, lyophilized, dissolved in 10  $\mu\text{L}$   $\text{H}_2\text{O}$ : 95% formamide loading buffer (1:1), and subjected to electrophoresis on a 20% denaturing PAGE.

### **References**

- (1) Mouw, K. W.; Rice, P. A. *Mol. Microbiol.* **2007**, *63*, 1319-1330.
- (2) Zhu, Q.; Delaney, M. O.; Greenberg, M. M. *Bioorg. & Med. Chem. Lett.* **2001**, *11*, 1105-1108.
- (3) Maniatis, T.; Fritsch, E. F.; Sambrook, J. *Molecular Cloning*; Cold Spring Harbor Laboratory, Cold Spring Harbor, NY., 1982.

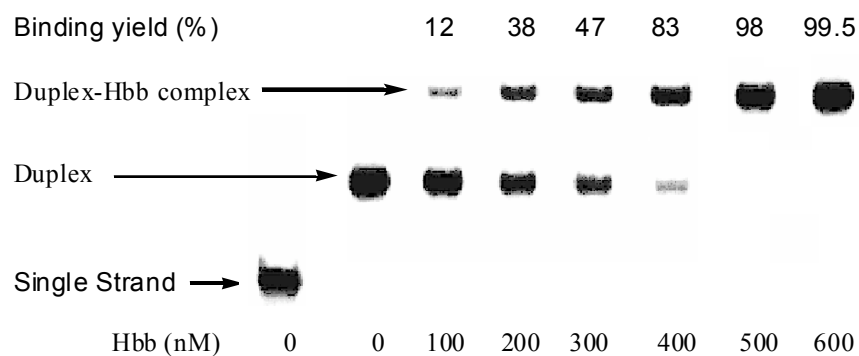

**Supporting Information Figure 1.** Phosphorimage autoradiogram of 12% non-denaturing PAGE analysis of Hbb-DNA binding (5'-<sup>32</sup>P-5) with 20 nM DNA and different concentrations of Hbb.

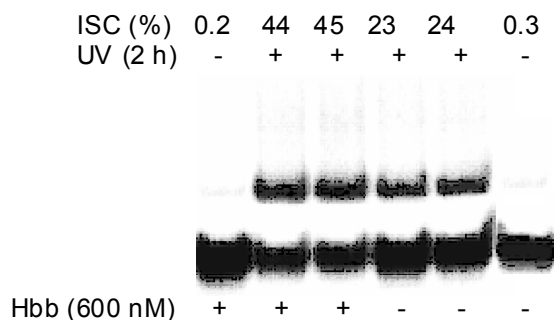

**Supporting Information Figure 2.** Phosphorimage autoradiogram of 12% denaturing PAGE analysis of ICL formation from **3** in 5'-<sup>32</sup>P-5 (strand containing **3** labeled) in the presence or absence of Hbb.

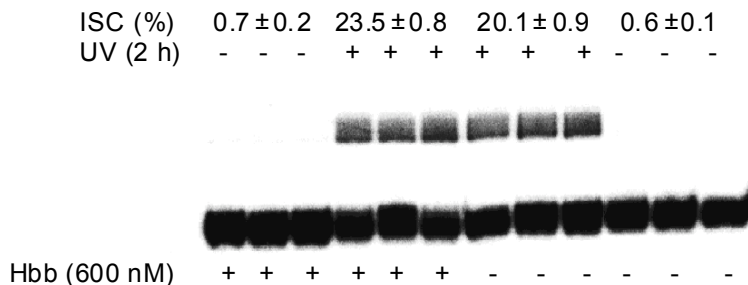

**Supporting Information Figure 3.** Phosphorimage autoradiogram of 12% denaturing PAGE analysis of ICL formation from **3** in 5'-<sup>32</sup>P-6 (strand containing **3** labeled) in the presence or absence of Hbb.

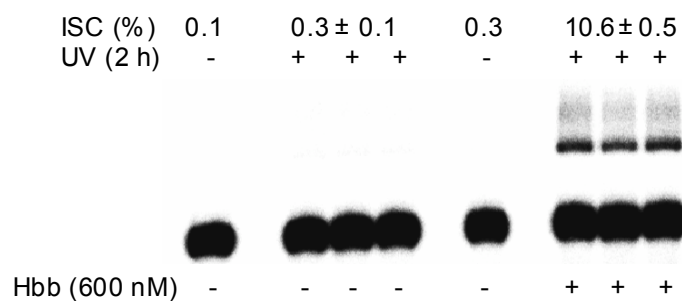

**Supporting Information Figure 4.** Phosphorimage autoradiogram of 12% denaturing PAGE analysis of ISC formation from **4** (strand containing **4** labeled) in 5'-<sup>32</sup>P-7 in the presence or absence of Hbb.

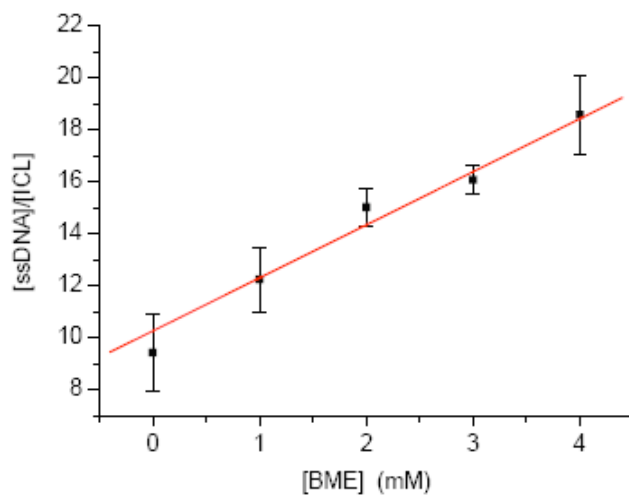

**Supporting Information Figure 5.** Ratio of [ssDNA]:[ICL] produced from photolysis of 5'-<sup>32</sup>P-7 (strand containing **4** labeled) in the presence of Hbb as a function of BME concentration (0 - 4 mM).

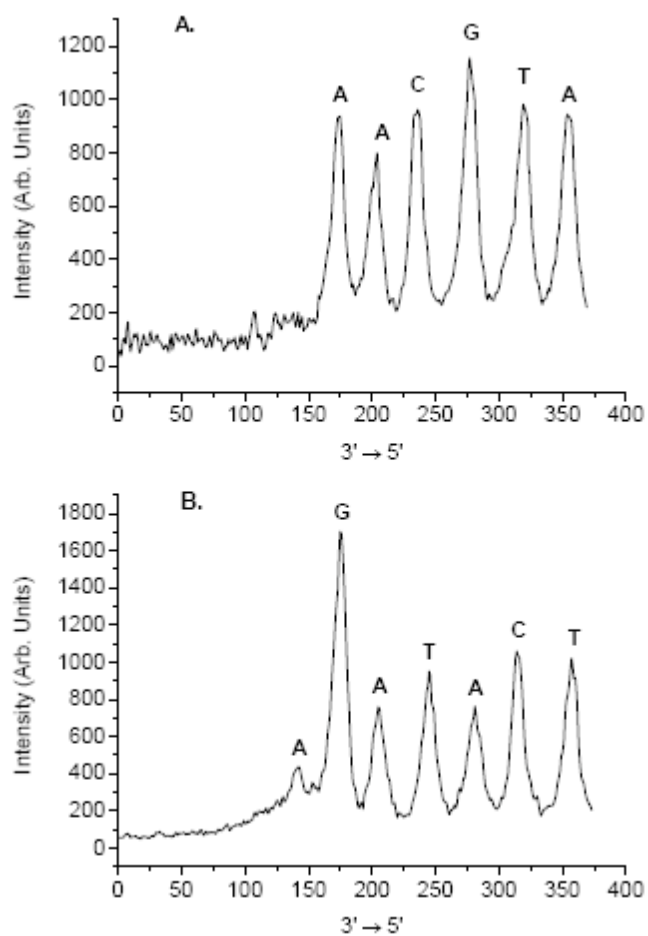

**Supporting Information Figure 6.** Histogram showing Fe-EDTA cleavage of ICL formed from **3** in 5'-<sup>32</sup>P-**5** (**A**) and from **4** in 5'-<sup>32</sup>P-**7** (**B**) generated by UV-irradiation (Complementary strand was labeled).

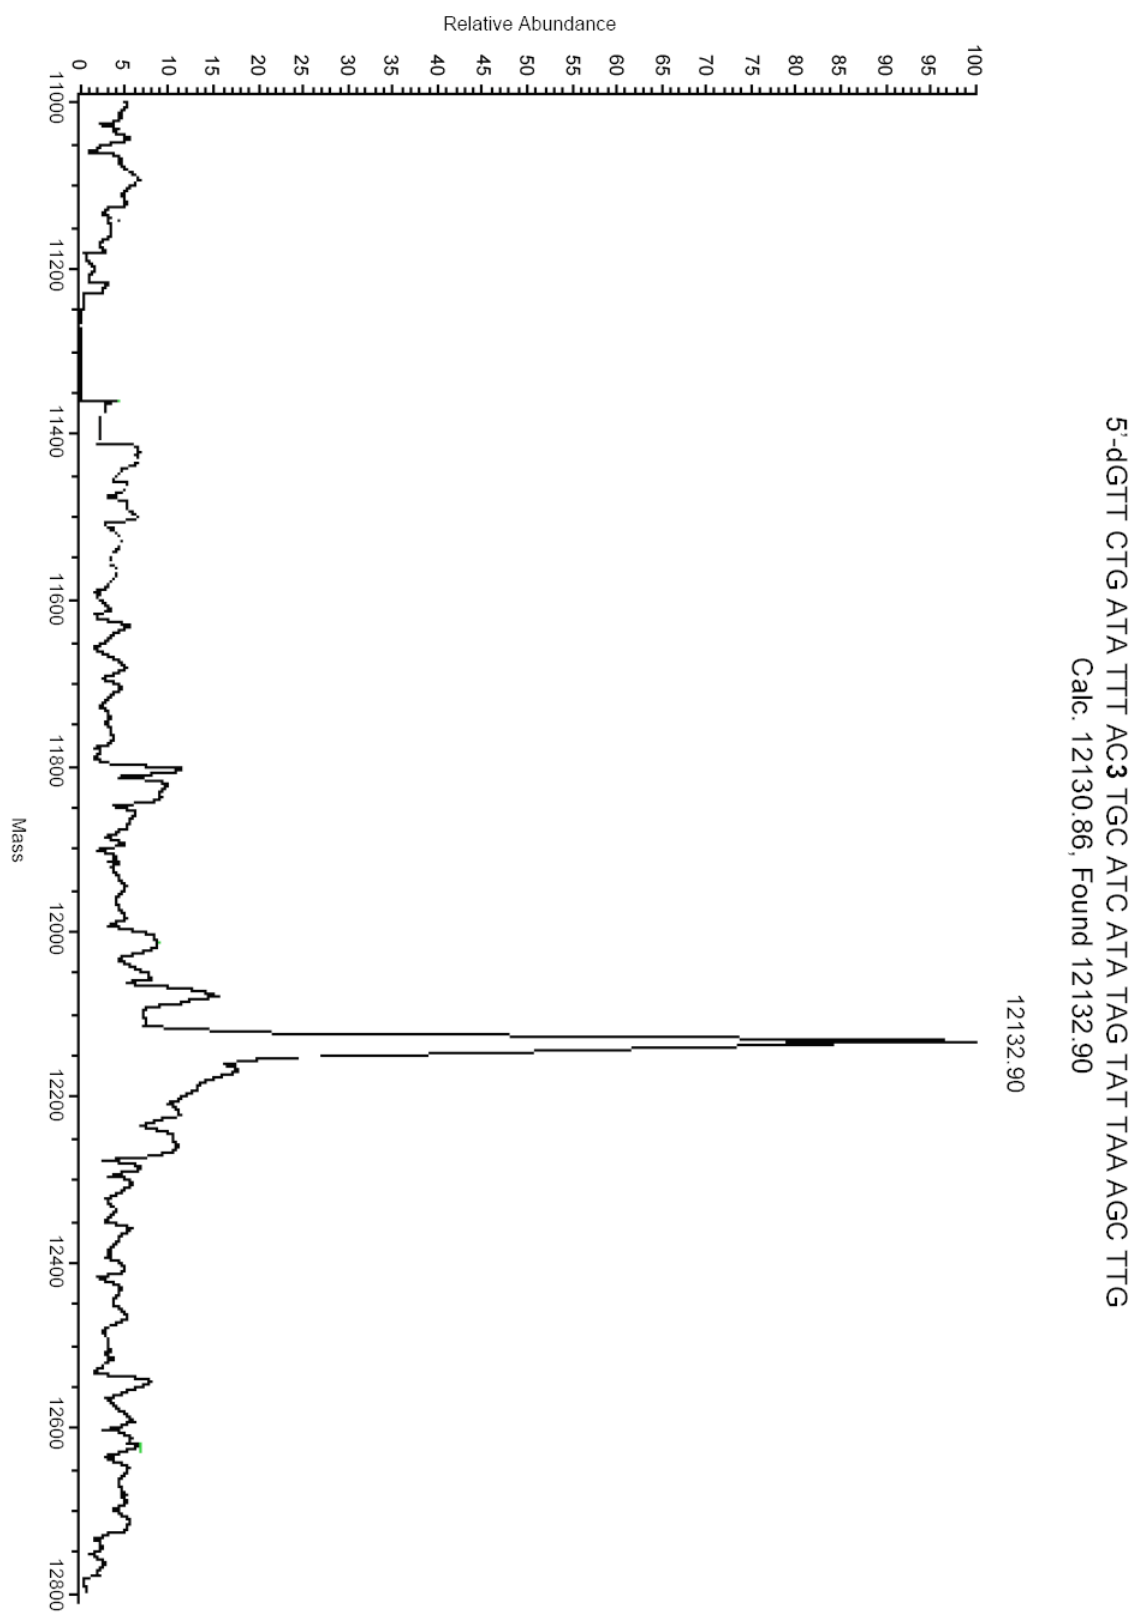

Supporting Information Figure 7. ESI-MS of the oligonucleotide containing **3** at Hbb bending site.

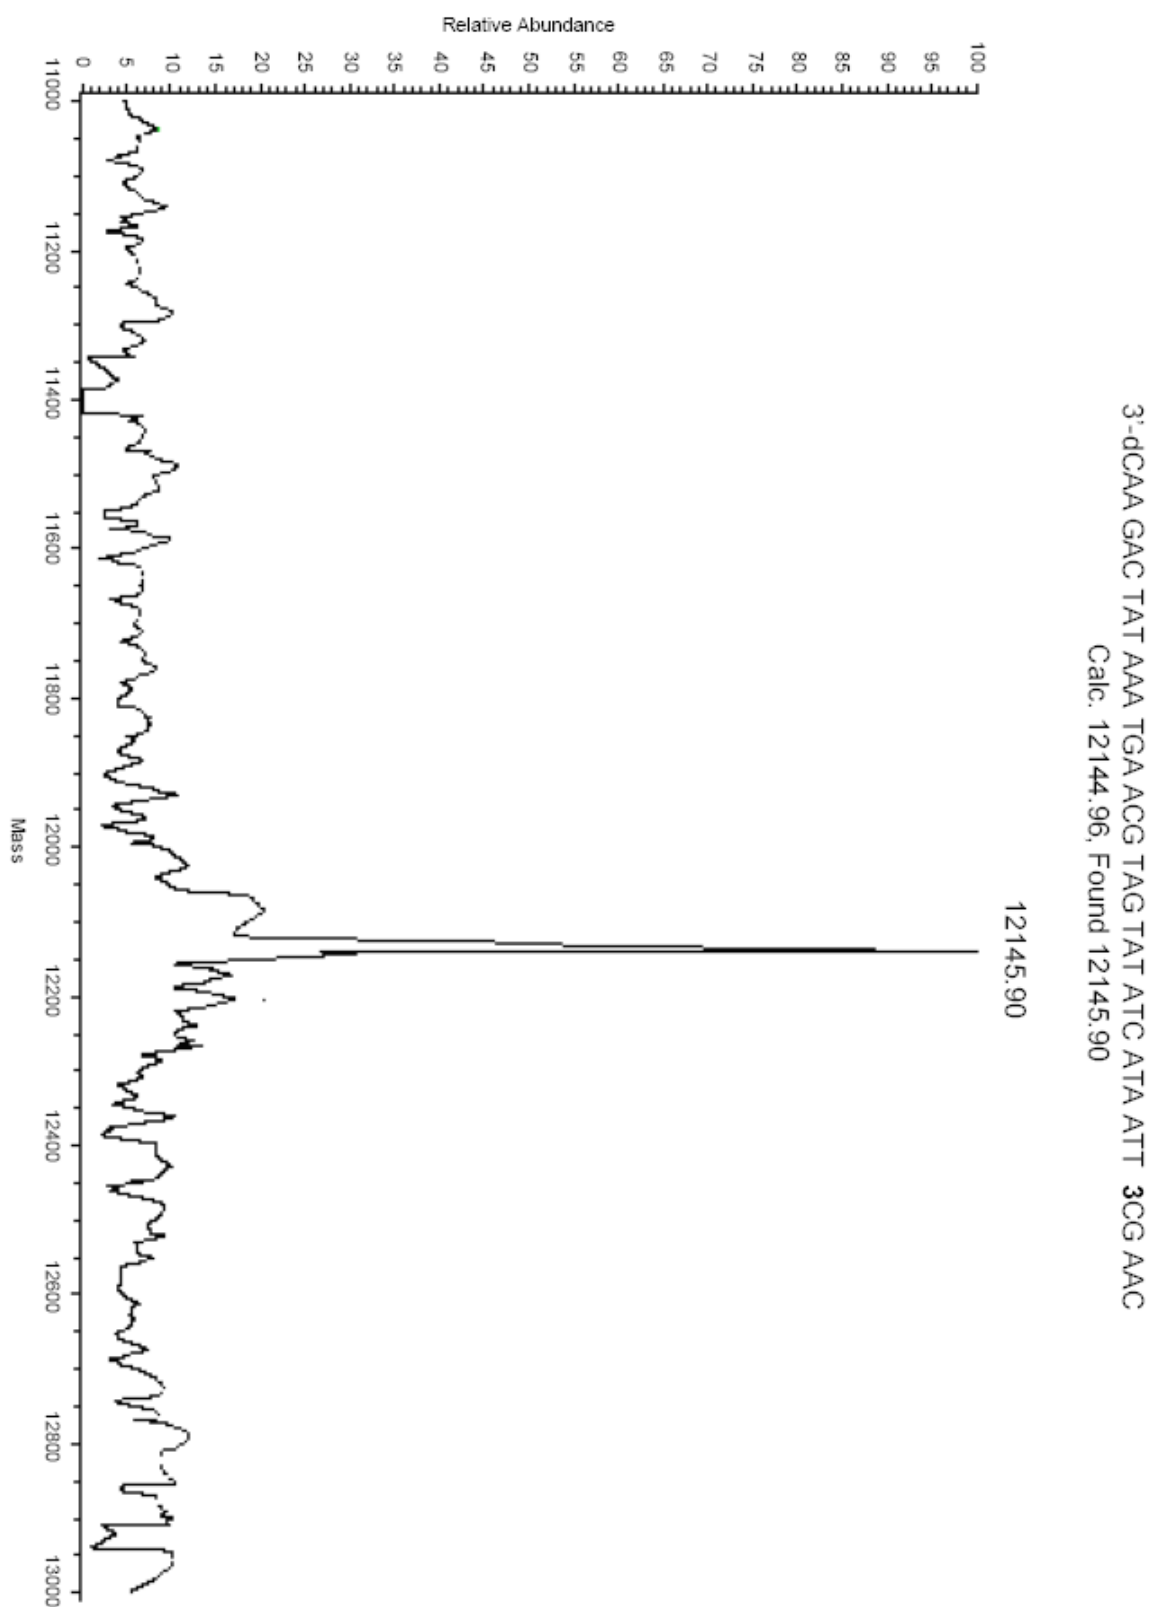

**Supporting Information Figure 8.** ESI-MS of the oligonucleotide containing **3** at non-bending site.



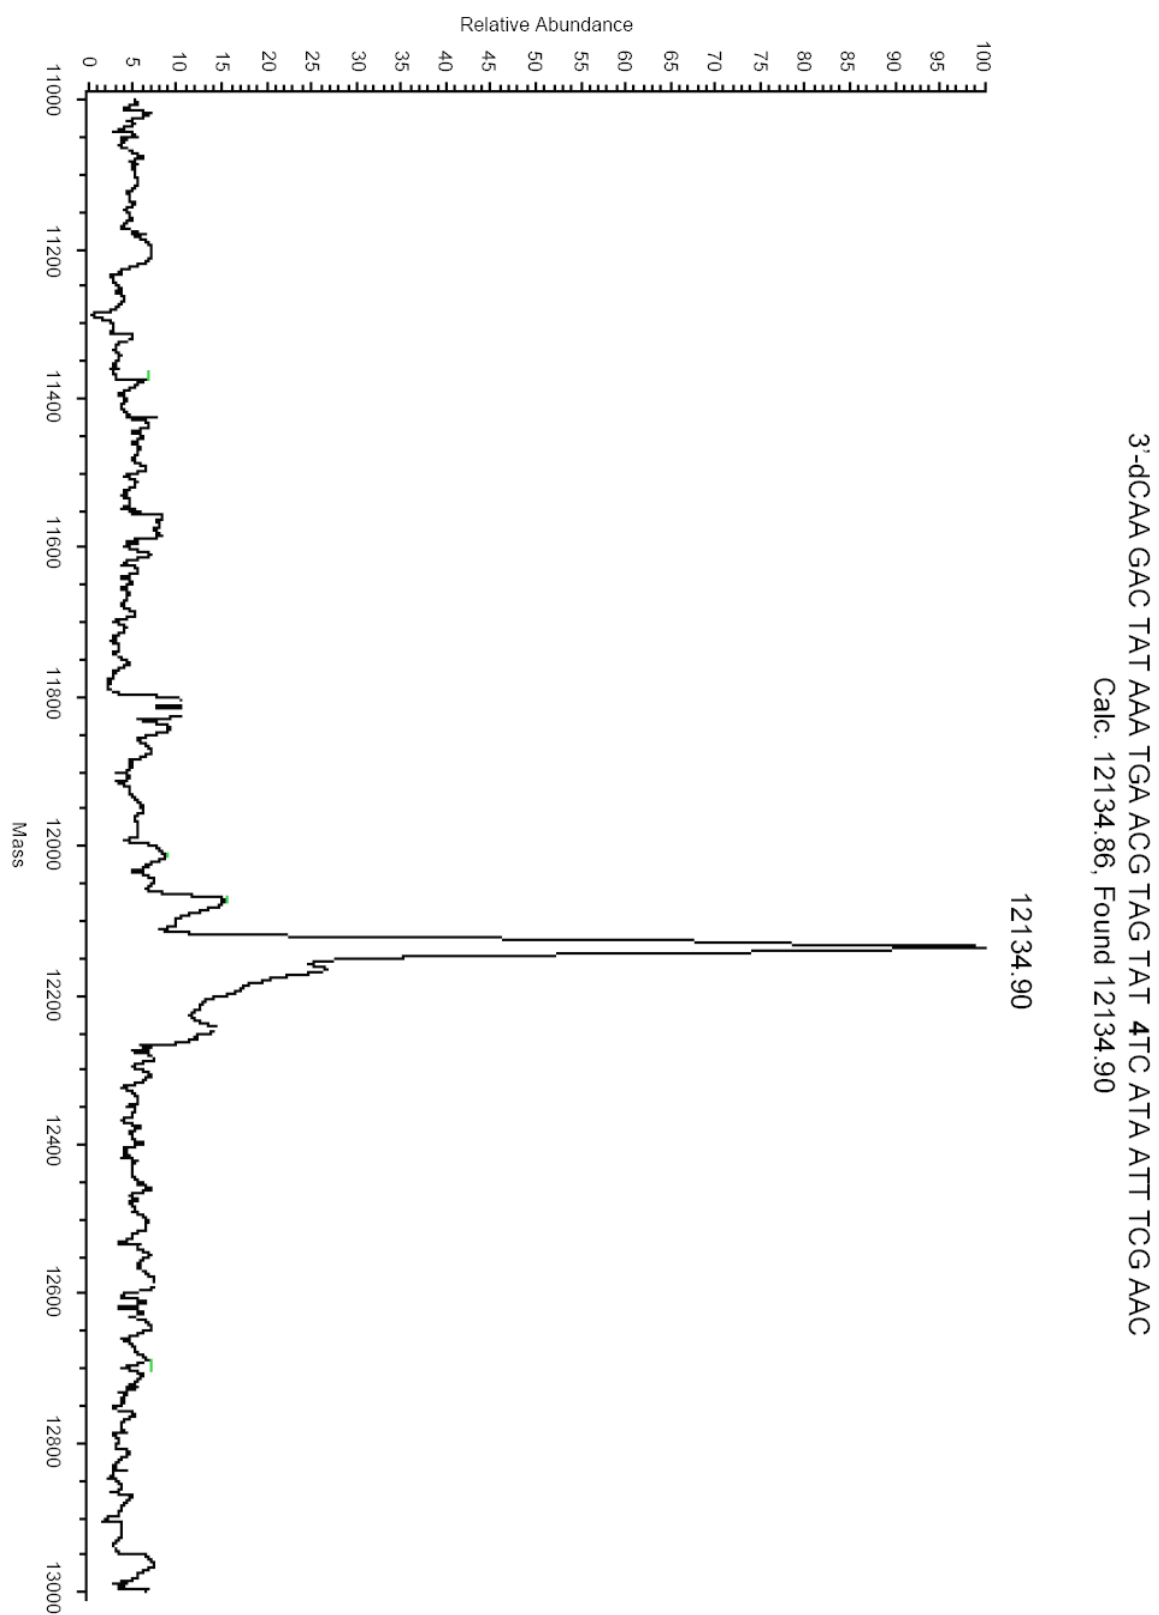

**Supporting Information Figure 9.** ESI-MS of the oligonucleotide containing **4** at Hbb bending site.

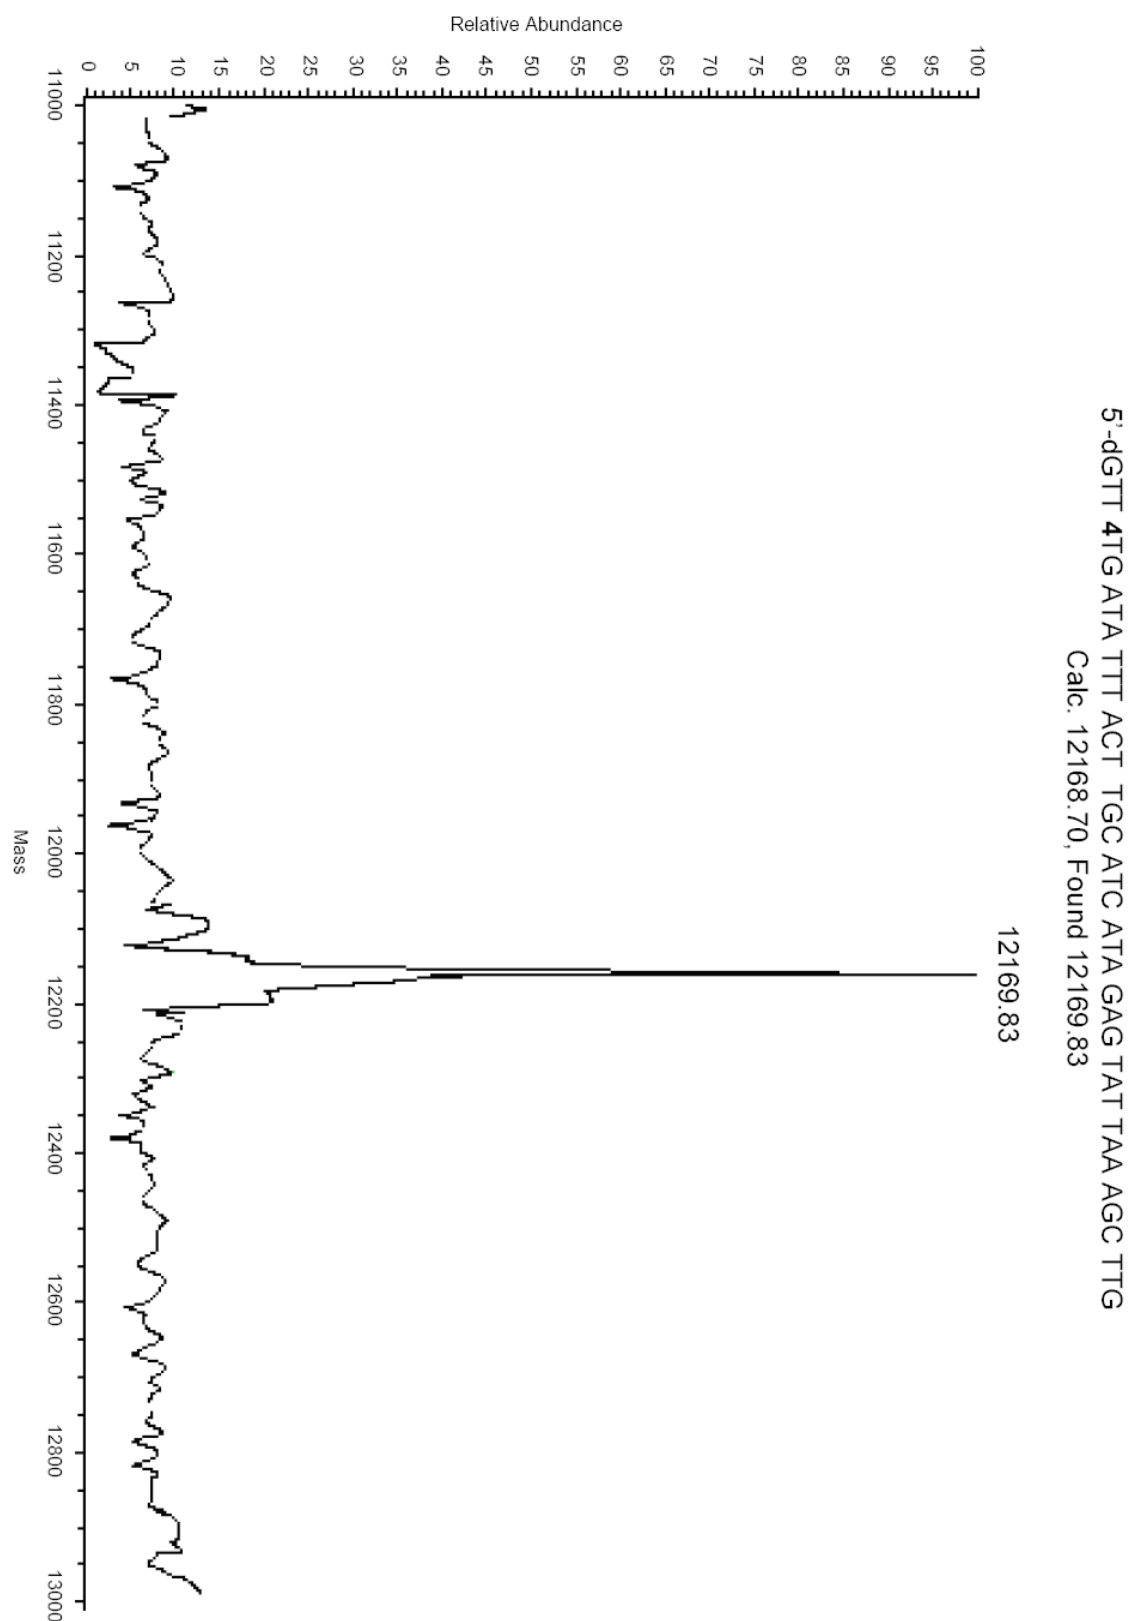

**Supporting Information Figure 10.** ESI-MS of the oligonucleotide containing **4** at non-bending site.
